# Supplementary material
Source: Research Square preprint supplement (doi:10.21203/rs.3.rs-9096293/v1)
Supplement: Supplementary file 1 [file 22e19ea7b9bae62ab1353393.xlsx]

## Sheet: Table_S1
Supplementary Table 1
Gene target	Oligonucleotide name	Sequence (5' to 3')
DDC	DDC-F	ACAACATGCTGCTCCTTTGAC
	DDC-R	TGAATCTGCAAACTCCACTCC
SLC6A3	SLC6A3-F	CTATCTCTTCTCCTCCTTCAC
	SLC6A3-R	GCACGCCACGTTCAAAGTAC
GPR183	GPR183-F	CTTCATCATTGGGCTCGTGG
	GPR183-R	AGGCATCTCCGATTCTCCAG
DRD1	DRD1-F	GTTTGTGTGGTTTGGGTGGG
	DRD1-R	TGGCATTATTCGTCGCAGGG
GRM4	GRM4-F	CCAGTCGGTGAAGATACCAC
	GRM4-R	AGCACACGCCTGATGTCATC
IL1RAPL2	IL1RAPL2-F	TCACAGACAAGCCTCCCAAG
	IL1RAPL2-R	AATGTGACCTGCCAGTTCTTC
MAOA	MAOA-F	AGGTGGCATTTCAGGACTATC
	MAOA-R	CTTAGACAAGCGTAAGATTCTG
SLC6A12	SLC6A12-F	CCAGGAAGACGAGGACCAG
	SLC6A12-R	GGATGAAGAAGGCTCCACCT
SLC6A13	SLC6A13-F	GGAAAAGAAGGAGGAAGATGG
	SLC6A13-R	ACAGGTAAAGAGGAAGACGAG
HTR1F	HTR1F-F	CATGAGGAGACGAAATGGTGA
	HTR1F-R	TGTTGTCATCAGTGCCAGCC
SSTR5	SSTR5-F	CGTCAACCAGTTCACCAGTG
	SSTR5-R	GCACAGAGACAGGACCCAG
TBP	TBP-F	CGGCTGTTTAACTTCGCTTC
	TBP-R	CACACGCCAAGAAACAGTGA
