# Supplementary material
Source: Research Square preprint supplement (doi:10.21203/rs.3.rs-9096293/v1)
Supplement: Supplementary file 2 [file 410cde1f9b186b3362ead470.xlsx]

## Sheet: Table S4
Supplementary Table 4
Gene ID	SYNGO Annotation
ACAN	perisynaptic extracellular matrix
CACNA1A	integral component of presynaptic active zone membrane - integral component of postsynaptic membrane - voltage-gated calcium channel activity involved in regulation of presynaptic cytosolic calcium levels
CBLN3	synaptic cleft
CNTN2	anchored component of postsynaptic membrane
CPLX3	anchored component of presynaptic active zone membrane - anchored component of synaptic vesicle membrane - regulation of synaptic vesicle fusion to presynaptic active zone membrane
DRD1	integral component of presynaptic/postsynaptic membrane - modification of postsynaptic structure - presynaptic/postsynaptic modulation of chemical synaptic transmission
GRM4	integral component of presynaptic active zone membrane - presynaptic modulation of chemical synaptic transmission
GSG1L	integral component of postsynaptic density membrane - regulation of postsynaptic neurotransmitter receptor endocytosis
IL1RAPL2	regulation of presynapse assembly
KCNC4	integral component of presynaptic/postsynaptic membrane -voltage-gated ion channel activity involved in regulation of presynaptic/postsynaptic membrane potential
NPY	neuronal dense core vesicle - regulation of presynaptic cytosolic calcium levels - regulation of synaptic vesicle exocytosis - synaptic signaling via neuropeptide
P2RX1	integral component of postsynaptic membrane - integral component of presynaptic active zone membrane - regulation of presynaptic cytosolic calcium levels - regulation of synaptic vesicle exocytosis
P2RY2	integral component of presynaptic active zone membrane - regulation of presynaptic cytosolic calcium levels - regulation of synaptic vesicle exocytosis
S1PR5	presynapse
SLC6A3	integral component of presynaptic/postsynaptic membrane - neurotransmitter uptake
