# Supplementary material
Source: Research Square preprint supplement (doi:10.21203/rs.3.rs-9096293/v1)
Supplement: Supplementary file 3 [file 42cd2c367395d6897733ee90.xlsx]

## Sheet: Table S2
Supplementary Table 2
ID	baseMean	log2FoldChange	lfcSE	stat	pvalue	padj	GENETYPE	Genename
ENSG00000230292	70.1757	9.51492	1.19571	7.95753	1.75502e-15	1.45603e-13	lncRNA	NAALADL2-AS3
ENSG00000171209	37.6413	8.61673	1.20833	7.13112	9.95558e-13	6.21629e-11	protein_coding	CSN3
ENSG00000227007	27.8212	8.18353	1.2233	6.6897	2.23635e-11	1.18099e-09	lncRNA	LINC01247
ENSG00000285963	23.0113	7.90698	1.22676	6.4454	1.15295e-10	5.42489e-09	lncRNA	ENSG00000285963
ENSG00000255300	20.2561	7.72619	1.23678	6.24702	4.1837e-10	1.78521e-08	lncRNA	LINC02745
ENSG00000204086	175.408	7.65112	0.657716	11.6329	2.80545e-31	8.19193e-29	protein_coding	RPA4
ENSG00000276027	32.4134	7.43144	1.21317	6.12561	9.03351e-10	3.64079e-08	snRNA	RNU12
ENSG00000276687	15.5605	7.33949	1.25655	5.84098	5.18949e-09	1.83567e-07	lncRNA	ENSG00000276687
ENSG00000188850	13.6341	7.14891	1.27032	5.62767	1.82665e-08	5.81872e-07	transcribed_processed_pseudogene	ENSG00000188850
ENSG00000261714	418.055	7.0528	0.351762	20.0499	2.02213e-89	2.31643e-86	processed_pseudogene	ENSG00000261714
ENSG00000267603	23.0805	6.94024	1.23016	5.64173	1.6835e-08	5.39735e-07	lncRNA	LINC01028
ENSG00000234730	10.879	6.82812	1.28198	5.32624	1.00269e-07	2.73731e-06	lncRNA	ENSG00000234730
ENSG00000162594	10.3583	6.75415	1.28839	5.24231	1.58579e-07	4.11421e-06	protein_coding	IL23R
ENSG00000240708	9.28908	6.60057	1.30119	5.0727	3.92207e-07	9.11193e-06	lncRNA	LINC02030
ENSG00000236172	8.71328	6.5112	1.3248	4.91487	8.88415e-07	1.89139e-05	lncRNA	MIR7515HG
ENSG00000285688	110.793	6.49375	0.568391	11.4248	3.14396e-30	8.51269e-28	lncRNA	ENSG00000285688
ENSG00000226230	8.54668	6.47368	1.31975	4.90524	9.33118e-07	1.97386e-05	processed_pseudogene	UFC1P1
ENSG00000237484	21.0652	5.89476	1.0913	5.4016	6.60486e-08	1.89153e-06	lncRNA	LINC01684
ENSG00000290599	28.6236	5.75086	0.888537	6.47227	9.65393e-11	4.57126e-09	lncRNA	ENSG00000290599
ENSG00000288084	8.86988	5.54207	1.29923	4.26565	1.99321e-05	0.000299557	lncRNA	ENSG00000288084
ENSG00000250198	14.4621	5.34235	1.11424	4.79462	1.62984e-06	3.23836e-05	lncRNA	LINC02199
ENSG00000287320	48.0526	5.07104	0.564018	8.99093	2.45146e-19	2.89739e-17	lncRNA	ENSG00000287320
ENSG00000229332	53.2419	5.04656	0.541145	9.32569	1.10262e-20	1.44038e-18	processed_pseudogene	PGBD4P8
ENSG00000254050	24.2238	4.75081	0.730209	6.5061	7.71274e-11	3.72916e-09	lncRNA	ENSG00000254050
ENSG00000286539	18.6654	4.69607	0.823943	5.6995	1.20156e-08	3.95004e-07	lncRNA	ENSG00000286539
ENSG00000249425	9.19834	4.66904	1.17242	3.98241	6.82202e-05	0.000863157	lncRNA	LINC02477
ENSG00000268686	156.435	4.58602	0.278369	16.4746	5.58742e-61	4.16039e-58	lncRNA	ENSG00000268686
ENSG00000288104	29.1226	4.51945	0.626599	7.21267	5.48656e-13	3.50669e-11	lncRNA	ENSG00000288104
ENSG00000271924	32.0879	4.46914	0.595329	7.50701	6.04933e-14	4.33109e-12	rRNA_pseudogene	RNA5SP108
ENSG00000270022	64.1637	4.46686	0.419179	10.6562	1.63112e-26	3.32748e-24	lncRNA	ENSG00000270022
ENSG00000287289	29.599	4.3448	0.591607	7.34406	2.07214e-13	1.38689e-11	lncRNA	ENSG00000287289
ENSG00000172186	12.9876	4.14984	0.856299	4.84625	1.25818e-06	2.58082e-05	processed_pseudogene	HMGN1P35
ENSG00000178175	9.11671	4.04487	1.00227	4.03571	5.44366e-05	0.000711114	protein_coding	ZNF366
ENSG00000179097	8.99181	4.02645	0.994742	4.04773	5.17169e-05	0.000682508	protein_coding	HTR1F
ENSG00000279531	11.6711	3.98524	0.868814	4.58698	4.49701e-06	8.0203e-05	TEC	ENSG00000279531
ENSG00000285684	34.8513	3.97393	0.501322	7.9269	2.24687e-15	1.84864e-13	lncRNA	ENSG00000285684
ENSG00000285758	62.7815	3.87811	0.369536	10.4946	9.14989e-26	1.74692e-23	lncRNA	ENSG00000285758
ENSG00000277797	12.4559	3.73586	1.33562	2.7971	0.00515634	0.0319685	lncRNA	ENSG00000277797
ENSG00000010932	162.19	3.66989	0.22364	16.4098	1.62816e-60	1.18276e-57	protein_coding	FMO1
ENSG00000249678	16.3569	3.63074	0.698801	5.19568	2.03974e-07	5.16596e-06	lncRNA	ENSG00000249678
ENSG00000250250	49.4481	3.57538	0.390374	9.15885	5.24525e-20	6.53659e-18	lncRNA	ENSG00000250250
ENSG00000289161	8.90878	3.56607	0.909973	3.91888	8.89618e-05	0.00107996	lncRNA	ENSG00000289161
ENSG00000171657	41.5608	3.53584	0.417856	8.46188	2.63103e-17	2.66539e-15	protein_coding	GPR82
ENSG00000250891	9.65429	3.3406	0.832966	4.01049	6.05926e-05	0.000777549	lncRNA	LINC02208
ENSG00000218107	13.378	3.32416	0.720549	4.61337	3.96193e-06	7.16902e-05	transcribed_processed_pseudogene	EXOSC8P1
ENSG00000270571	69.9185	3.26416	0.312878	10.4327	1.7584e-25	3.25294e-23	lncRNA	ENSG00000270571
ENSG00000200091	25.7124	3.26128	0.503857	6.47262	9.63159e-11	4.56882e-09	misc_RNA	RN7SKP163
ENSG00000272829	163.926	3.19412	0.198285	16.1088	2.21422e-58	1.53368e-55	lncRNA	ENSG00000272829
ENSG00000183773	156.925	3.14067	0.204646	15.3469	3.71721e-53	2.30653e-50	protein_coding	AIFM3
ENSG00000235681	92.7958	2.98397	0.260437	11.4576	2.15512e-30	5.88881e-28	processed_pseudogene	ENSG00000235681
ENSG00000205424	39.4593	2.95155	0.382972	7.70696	1.28851e-14	9.91654e-13	lncRNA	PCBP3-AS1
ENSG00000108244	36.2409	2.94535	0.401836	7.32974	2.30606e-13	1.52292e-11	protein_coding	KRT23
ENSG00000278475	19.3143	2.91591	0.559132	5.21507	1.83747e-07	4.69359e-06	lncRNA	ENSG00000278475
ENSG00000259165	74.2134	2.91576	0.291359	10.0074	1.41372e-23	2.25167e-21	transcribed_processed_pseudogene	DDX18P1
ENSG00000259020	66.3322	2.90919	0.305974	9.50797	1.94426e-21	2.71868e-19	processed_pseudogene	ENSG00000259020
ENSG00000290699	16.6593	2.80518	0.576266	4.86786	1.12812e-06	2.33819e-05
ENSG00000081051	34.1878	2.77659	0.412461	6.73176	1.67625e-11	8.96329e-10	protein_coding	AFP
ENSG00000227579	15.9378	2.73218	0.602261	4.53654	5.71839e-06	9.94258e-05	lncRNA	ENSG00000227579
ENSG00000196366	254.128	2.71635	0.157423	17.2551	1.02469e-66	8.47763e-64	lncRNA	C9orf163
ENSG00000235413	74.7847	2.71361	0.272532	9.95702	2.35003e-23	3.68385e-21	processed_pseudogene	KRT18P63
ENSG00000169953	8.96679	2.68014	0.792405	3.38229	0.000718837	0.00641397	protein_coding	HSFY2
ENSG00000282944	13.3517	2.58015	0.618042	4.17471	2.98367e-05	0.000421564	lncRNA	CYP4F30P
ENSG00000287927	9.68882	2.57199	0.745491	3.45006	0.000560467	0.00521655	lncRNA	ENSG00000287927
ENSG00000286121	20.2159	2.54893	0.515779	4.94191	7.73604e-07	1.66843e-05	lncRNA	ENSG00000286121
ENSG00000167523	1842.94	2.54652	0.0625603	40.705	0	0	protein_coding	SPATA33
ENSG00000186088	90.1589	2.52248	0.24556	10.2723	9.38934e-25	1.65475e-22	protein_coding	GSAP
ENSG00000287424	16.3849	2.52122	0.552759	4.56115	5.08734e-06	8.95516e-05	lncRNA	ENSG00000287424
ENSG00000285884	117.786	2.48278	0.216341	11.4762	1.7367e-30	4.83419e-28	lncRNA	ENSG00000285884
ENSG00000104901	117.372	2.42395	0.213729	11.3412	8.19839e-30	2.12331e-27	protein_coding	DKKL1
ENSG00000289077	11.0239	2.40924	0.721362	3.33985	0.00083824	0.00727451	lncRNA	ENSG00000289077
ENSG00000259751	9.45558	2.33663	0.757765	3.08358	0.00204527	0.0151949	processed_pseudogene	TUBAP11
ENSG00000289766	12.4526	2.32198	0.643718	3.60713	0.000309598	0.00314927	protein_coding	ENSG00000289766
ENSG00000287290	16.3755	2.28046	0.574187	3.97163	7.13811e-05	0.000897432	lncRNA	ENSG00000287290
ENSG00000234653	12.1927	2.27989	0.633265	3.60022	0.000317947	0.00322338	lncRNA	LRRTM4-AS1
ENSG00000247081	650.576	2.26936	0.091804	24.7196	6.58539e-135	1.08966e-131	lncRNA	BAALC-AS1
ENSG00000228657	8.86924	2.23168	0.773172	2.8864	0.0038968	0.0255082	processed_pseudogene	RPL23AP58
ENSG00000285867	38.5289	2.23162	0.364762	6.11804	9.47353e-10	3.80782e-08	lncRNA	ENSG00000285867
ENSG00000242308	8.85763	2.22248	0.7942	2.79838	0.00513589	0.0318549	unprocessed_pseudogene	MAT2AP1
ENSG00000251632	20.3531	2.11863	0.494514	4.28427	1.83343e-05	0.000278749	lncRNA	LINC02172
ENSG00000231291	8.15666	2.06765	0.763829	2.70695	0.00679037	0.0398197	lncRNA	ENSG00000231291
ENSG00000164342	119.014	2.05571	0.198061	10.3792	3.08444e-25	5.60165e-23	protein_coding	TLR3
ENSG00000260452	8.02482	2.04398	0.769166	2.6574	0.00787456	0.044614	processed_pseudogene	TPRKBP2
ENSG00000111305	36.6487	2.01229	0.359088	5.60389	2.09588e-08	6.61269e-07	protein_coding	GSG1
ENSG00000257752	49.2674	1.98763	0.309928	6.4132	1.425e-10	6.58017e-09	processed_pseudogene	ENSG00000257752
ENSG00000234020	9.36972	1.96379	0.747058	2.6287	0.00857124	0.0475836	transcribed_unprocessed_pseudogene	CHIAP3
ENSG00000145309	11.7899	1.94711	0.610332	3.19025	0.0014215	0.0112541	protein_coding	CABS1
ENSG00000278987	136.615	1.93807	0.183349	10.5704	4.08856e-26	8.01143e-24	TEC	ENSG00000278987
ENSG00000241231	20.013	1.93025	0.485086	3.97919	6.91517e-05	0.000872718	lncRNA	ENSG00000241231
ENSG00000272457	9.87448	1.89908	0.681151	2.78804	0.00530272	0.0327058	lncRNA	ENSG00000272457
ENSG00000270031	14.6446	1.88752	0.57569	3.27871	0.00104284	0.00873944	lncRNA	ENSG00000270031
ENSG00000234477	13.3569	1.81778	0.59552	3.05243	0.00226999	0.0165426	lncRNA	ENSG00000234477
ENSG00000251510	11.7495	1.81777	0.606813	2.9956	0.00273909	0.0192091	lncRNA	ENSG00000251510
ENSG00000286653	28.9836	1.80182	0.45178	3.98827	6.65572e-05	0.000846792	lncRNA	ENSG00000286653
ENSG00000241743	529.129	1.77376	0.0991225	17.8946	1.29822e-71	1.17171e-68	lncRNA	XACT
ENSG00000168267	16.1231	1.76905	0.533627	3.31515	0.000915942	0.00784596	protein_coding	PTF1A
ENSG00000230005	13.0481	1.76678	0.667663	2.64621	0.00813996	0.0458127	lncRNA	SNAP47-AS1
ENSG00000204740	22.683	1.74695	0.432494	4.03925	5.36213e-05	0.000702003	protein_coding	MALRD1
ENSG00000240399	45.3449	1.74321	0.311181	5.60191	2.12006e-08	6.68188e-07	transcribed_processed_pseudogene	ENSG00000240399
ENSG00000261430	13.5191	1.7406	0.576366	3.01995	0.00252815	0.0179796	lncRNA	ENSG00000261430
ENSG00000205086	116.232	1.73146	0.191693	9.03247	1.67837e-19	2.00757e-17	lncRNA	LINC02898
ENSG00000135226	11.9832	1.73118	0.625965	2.76563	0.00568138	0.0345216	protein_coding	UGT2B28
ENSG00000223284	11.8847	1.71915	0.599113	2.86948	0.00411143	0.026677	snRNA	RNU6-195P
ENSG00000255328	16.4507	1.71547	0.55004	3.1188	0.00181586	0.0137969
ENSG00000279432	96.6043	1.68762	0.22188	7.60603	2.82643e-14	2.09409e-12	TEC	ENSG00000279432
ENSG00000287516	63.3845	1.6528	0.262504	6.29629	3.0486e-10	1.32748e-08	lncRNA	ENSG00000287516
ENSG00000104043	120.653	1.64896	0.191369	8.61666	6.89357e-18	7.3067e-16	protein_coding	ATP8B4
ENSG00000242428	19.3656	1.64353	0.508845	3.22992	0.00123827	0.010042	lncRNA	CFAP20DC-AS1
ENSG00000212916	14.148	1.61846	0.539995	2.99719	0.00272485	0.019134	protein_coding	MAP10
ENSG00000259042	16.2549	1.61684	0.533795	3.02896	0.00245399	0.0176035	lncRNA	ENSG00000259042
ENSG00000278716	29.5518	1.61274	0.390498	4.12996	3.62822e-05	0.000499367	lncRNA	ENSG00000278716
ENSG00000233324	14.7953	1.59817	0.571018	2.79881	0.00512916	0.0318264	processed_pseudogene	EEF1A1P34
ENSG00000124564	12.5791	1.59378	0.581606	2.74031	0.00613813	0.0367474	protein_coding	SLC17A3
ENSG00000224204	20.8781	1.59248	0.459222	3.46778	0.00052478	0.00491975
ENSG00000258081	171.515	1.5821	0.162953	9.70895	2.76178e-22	4.07212e-20
ENSG00000104518	17.5629	1.53316	0.488117	3.14096	0.00168396	0.0129633	protein_coding	GSDMD
ENSG00000186960	18.2543	1.52952	0.497355	3.07531	0.00210284	0.0155798	lncRNA	LINC01551
ENSG00000166573	28.2873	1.52715	0.385234	3.96422	7.36369e-05	0.000922288	protein_coding	GALR1
ENSG00000285748	16.7904	1.51966	0.492715	3.08425	0.00204066	0.0151749	lncRNA	ENSG00000285748
ENSG00000271732	17.9722	1.4254	0.490875	2.9038	0.00368662	0.0243771	lncRNA	ENSG00000271732
ENSG00000272858	15.2462	1.41649	0.524569	2.70029	0.00692798	0.0403961	lncRNA	ENSG00000272858
ENSG00000206775	29.8438	1.367	0.372352	3.67126	0.000241358	0.00255949	snoRNA	SNORD37
ENSG00000196834	105.465	1.30277	0.196461	6.63122	3.32926e-11	1.73354e-09	protein_coding	POTEI
ENSG00000215912	33.0475	1.30231	0.350565	3.7149	0.000203282	0.00220861	protein_coding	TTC34
ENSG00000118308	99.3663	1.2805	0.199892	6.40598	1.4941e-10	6.86731e-09	protein_coding	IRAG2
ENSG00000285700	43.9696	1.24519	0.306183	4.06682	4.7659e-05	0.000637393	lncRNA	ENSG00000285700
ENSG00000250669	25.0723	1.24457	0.405411	3.0699	0.00214127	0.0157822	transcribed_processed_pseudogene	ENSG00000250669
ENSG00000203797	22.6882	1.23476	0.413522	2.98595	0.00282696	0.0196771	protein_coding	DDO
ENSG00000165124	595.793	1.22952	0.0899969	13.6618	1.71588e-42	7.74329e-40	protein_coding	SVEP1
ENSG00000167483	37.1323	1.22605	0.323497	3.78999	0.00015065	0.00170997	protein_coding	NIBAN3
ENSG00000229808	19.0787	1.21775	0.44711	2.7236	0.00645751	0.0382215	transcribed_processed_pseudogene	ENSG00000229808
ENSG00000189221	308.204	1.19426	0.115868	10.3071	6.54615e-25	1.17452e-22	protein_coding	MAOA
ENSG00000272139	20.9632	1.18224	0.430637	2.74533	0.00604497	0.0363431	lncRNA	ENSG00000272139
ENSG00000284265	23.7164	1.1731	0.420577	2.78925	0.00528296	0.0326109	miRNA	MIR4683
ENSG00000259345	44.6562	1.1721	0.306281	3.82689	0.000129774	0.00150397	lncRNA	ENSG00000259345
ENSG00000256250	39.5604	1.1417	0.3112	3.66869	0.000243792	0.00257943	lncRNA	ENSG00000256250
ENSG00000116833	41.2004	1.14155	0.31259	3.65191	0.000260293	0.0027317	protein_coding	NR5A2
ENSG00000282556	71.0702	1.12103	0.25745	4.35435	1.33464e-05	0.000211758	lncRNA	ENSG00000282556
ENSG00000280304	33.824	1.10353	0.348006	3.171	0.00151916	0.0118883	TEC	ENSG00000280304
ENSG00000132437	518.416	1.07098	0.095326	11.2349	2.74828e-29	6.82123e-27	protein_coding	DDC
ENSG00000233045	41.2576	1.06415	0.324163	3.28275	0.00102798	0.00862462	processed_pseudogene	RPL15P5
ENSG00000273507	82.401	1.06238	0.228144	4.65661	3.21458e-06	5.95048e-05	lncRNA	ENSG00000273507
ENSG00000265574	68.5012	1.05533	0.266054	3.96658	7.29115e-05	0.000914356	processed_pseudogene	WDR45BP1
ENSG00000176165	93.3822	1.02922	0.209848	4.90459	9.3624e-07	1.97906e-05	protein_coding	FOXG1
ENSG00000042781	83.4608	1.02917	0.215162	4.78322	1.72512e-06	3.40949e-05	protein_coding	USH2A
ENSG00000184845	39.3435	1.01796	0.361288	2.81759	0.00483862	0.0303525	protein_coding	DRD1
ENSG00000198734	232.143	1.01493	0.148147	6.85082	7.34266e-12	4.1341e-10	protein_coding	F5
ENSG00000284586	40.0837	-1.00107	0.31968	-3.13147	0.00173932	0.0133412	miRNA	MIR92B
ENSG00000179673	98.5036	-1.00186	0.196934	-5.0873	3.63199e-07	8.48432e-06	protein_coding	RPRML
ENSG00000269445	37.7098	-1.00367	0.330304	-3.03862	0.00237662	0.0171517	lncRNA	ENSG00000269445
ENSG00000168071	914.411	-1.00917	0.0776754	-12.9922	1.35494e-38	5.24098e-36	protein_coding	CCDC88B
ENSG00000206693	34.0119	-1.01392	0.341572	-2.96839	0.00299367	0.0205786	snoRNA	SNORA56
ENSG00000134516	26.1508	-1.01454	0.386359	-2.62589	0.00864226	0.0478441	protein_coding	DOCK2
ENSG00000275549	34.6227	-1.01537	0.336165	-3.02045	0.00252403	0.0179631	lncRNA	STPG3-AS1
ENSG00000268655	38.6165	-1.0173	0.31873	-3.19173	0.00141424	0.0112056	protein_coding	SAXO3
ENSG00000122585	44.9037	-1.01888	0.30397	-3.35191	0.00080255	0.00702621	protein_coding	NPY
ENSG00000117115	294.883	-1.01935	0.120041	-8.49171	2.03614e-17	2.08399e-15	protein_coding	PADI2
ENSG00000181965	499.606	-1.01943	0.0950246	-10.728	7.51658e-27	1.55468e-24	protein_coding	NEUROG1
ENSG00000187479	626.21	-1.0274	0.0874761	-11.7449	7.50222e-32	2.28006e-29	protein_coding	C11orf96
ENSG00000144891	32.2961	-1.03037	0.348415	-2.9573	0.00310349	0.0211714	protein_coding	AGTR1
ENSG00000183072	30.0578	-1.03097	0.368847	-2.79511	0.00518825	0.0321195	protein_coding	NKX2-5
ENSG00000261606	318.367	-1.03288	0.123464	-8.36586	5.96784e-17	5.8087e-15	lncRNA	ENSG00000261606
ENSG00000127152	262.553	-1.03821	0.131597	-7.88934	3.03795e-15	2.45876e-13	protein_coding	BCL11B
ENSG00000107593	118.113	-1.04072	0.179839	-5.78694	7.16782e-09	2.46236e-07	protein_coding	PKD2L1
ENSG00000241494	133.748	-1.04123	0.201518	-5.16694	2.37963e-07	5.88662e-06	processed_pseudogene	ENSG00000241494
ENSG00000269466	47.4304	-1.04162	0.2911	-3.57823	0.000345932	0.00345978	protein_coding	H3Y1
ENSG00000279607	41.0795	-1.05097	0.318103	-3.30386	0.000953646	0.00810137	lncRNA	ENSG00000279607
ENSG00000154864	3064.8	-1.05101	0.0497675	-21.1184	5.38688e-99	6.68512e-96	protein_coding	PIEZO2
ENSG00000275067	33.4925	-1.05297	0.349148	-3.01584	0.00256271	0.0181863	miRNA	MIR6825
ENSG00000132965	40.643	-1.0534	0.347574	-3.03073	0.00243966	0.0175302	protein_coding	ALOX5AP
ENSG00000276168	18256.1	-1.05605	0.228417	-4.62333	3.77635e-06	6.85823e-05	misc_RNA	RN7SL1
ENSG00000094755	79.6196	-1.05672	0.223326	-4.73175	2.22591e-06	4.29939e-05	protein_coding	GABRP
ENSG00000279187	37.2043	-1.06421	0.316247	-3.36512	0.00076511	0.00674602	TEC	ENSG00000279187
ENSG00000225756	129.961	-1.06778	0.172427	-6.19264	5.91654e-10	2.45772e-08	lncRNA	DBH-AS1
ENSG00000213578	310.491	-1.06791	0.124647	-8.56753	1.05731e-17	1.10884e-15	protein_coding	CPLX3
ENSG00000163701	63.4015	-1.06838	0.270688	-3.94692	7.91646e-05	0.000981614	protein_coding	IL17RE
ENSG00000288020	30.5178	-1.0724	0.354699	-3.02341	0.00249941	0.0178519	lncRNA	ENSG00000288020
ENSG00000064655	1842.23	-1.07959	0.0607221	-17.7792	1.02367e-70	8.71111e-68	protein_coding	EYA2
ENSG00000287637	39.07	-1.07963	0.348849	-3.09485	0.00196916	0.0147546	lncRNA	ENSG00000287637
ENSG00000227877	38.9054	-1.07972	0.341305	-3.1635	0.00155885	0.0121637	protein_coding	MRLN
ENSG00000291250	236.818	-1.08068	0.134468	-8.03671	9.22803e-16	7.92069e-14	lncRNA	ENSG00000291250
ENSG00000083307	29.2095	-1.08072	0.361223	-2.99183	0.00277307	0.0194017	protein_coding	GRHL2
ENSG00000269019	61.3793	-1.08106	0.254935	-4.24052	2.23007e-05	0.000329466	lncRNA	HOMER3-AS1
ENSG00000287620	49.6317	-1.08247	0.290079	-3.73165	0.000190232	0.00208228	lncRNA	ENSG00000287620
ENSG00000144015	37.1689	-1.08439	0.334943	-3.23755	0.0012056	0.00982421	protein_coding	TRIM43
ENSG00000289747	62.181	-1.08721	0.277693	-3.91514	9.03517e-05	0.00109223	protein_coding	ENSG00000289747
ENSG00000255753	63.0421	-1.08868	0.251678	-4.3257	1.52048e-05	0.000236975	processed_pseudogene	ENSG00000255753
ENSG00000173762	50.4824	-1.09313	0.275424	-3.96891	7.22018e-05	0.000906983	protein_coding	CD7
ENSG00000197859	63.1855	-1.09474	0.251538	-4.35218	1.34789e-05	0.000212974	protein_coding	ADAMTSL2
ENSG00000251992	60.0011	-1.09503	0.26993	-4.05671	4.97693e-05	0.000661458	scaRNA	SCARNA17
ENSG00000230303	368.297	-1.10243	0.106213	-10.3795	3.07335e-25	5.60165e-23	lncRNA	ENSG00000230303
ENSG00000198624	102.352	-1.10523	0.198141	-5.57802	2.43278e-08	7.61112e-07	protein_coding	CCDC69
ENSG00000254154	414.561	-1.10656	0.105354	-10.5032	8.35077e-26	1.60464e-23	lncRNA	CRYZL2P-SEC16B
ENSG00000120341	401.59	-1.10896	0.110204	-10.0628	8.07061e-24	1.32074e-21	protein_coding	SEC16B
ENSG00000185739	1952.74	-1.11042	0.055093	-20.1553	2.41679e-90	2.87927e-87	protein_coding	SRL
ENSG00000253686	26.9806	-1.11097	0.411763	-2.69808	0.00697415	0.0405796	lncRNA	LINC01484
ENSG00000286134	25.7369	-1.11222	0.390962	-2.84483	0.00444357	0.0283399	lncRNA	ENSG00000286134
ENSG00000227388	37.5631	-1.11292	0.318056	-3.49912	0.000466791	0.00447038	lncRNA	ENSG00000227388
ENSG00000261448	26.1282	-1.11653	0.377845	-2.95498	0.00312689	0.0212969	lncRNA	ENSG00000261448
ENSG00000168427	85.5141	-1.12107	0.216241	-5.18435	2.16773e-07	5.45302e-06	protein_coding	KLHL30
ENSG00000136457	50.5009	-1.12812	0.293167	-3.84804	0.000119067	0.00139125	protein_coding	CHAD
ENSG00000207631	30.6425	-1.12867	0.358293	-3.15013	0.00163195	0.0126184	miRNA	MIR641
ENSG00000228536	49.7777	-1.12971	0.277745	-4.06745	4.75305e-05	0.00063596	lncRNA	LYPLAL1-AS1
ENSG00000205549	33.3609	-1.12984	0.345973	-3.26568	0.00109201	0.00905722	lncRNA	LINC03041
ENSG00000223908	31.697	-1.13065	0.379994	-2.97544	0.00292569	0.0202366	processed_pseudogene	ENSG00000223908
ENSG00000090376	27.8727	-1.13253	0.374783	-3.02183	0.0025125	0.017911	protein_coding	IRAK3
ENSG00000177354	56.0933	-1.13552	0.26308	-4.31625	1.58702e-05	0.000246572	protein_coding	C10orf71
ENSG00000106927	39.9075	-1.13703	0.311598	-3.64902	0.000263246	0.00275585	protein_coding	AMBP
ENSG00000060656	1581.77	-1.13793	0.0599833	-18.9708	2.97227e-80	3.16164e-77	protein_coding	PTPRU
ENSG00000185736	226.063	-1.1386	0.138757	-8.20571	2.29233e-16	2.08792e-14	protein_coding	ADARB2
ENSG00000232600	25.8352	-1.13892	0.421165	-2.70422	0.00684656	0.040031	lncRNA	TONSL-AS1
ENSG00000273730	70.918	-1.13971	0.264076	-4.31582	1.59015e-05	0.000246929
ENSG00000279622	26.6739	-1.14394	0.412796	-2.7712	0.00558506	0.0340383	lncRNA	ENSG00000279622
ENSG00000155367	215.084	-1.1442	0.155827	-7.34275	2.09246e-13	1.39167e-11	protein_coding	PPM1J
ENSG00000162745	692.736	-1.14988	0.0973899	-11.807	3.59277e-32	1.11466e-29	protein_coding	OLFML2B
ENSG00000160282	62.1675	-1.15039	0.249446	-4.61176	3.99266e-06	7.21586e-05	protein_coding	FTCD
ENSG00000261976	34.8212	-1.15343	0.345063	-3.34268	0.000829743	0.0072176	lncRNA	ENSG00000261976
ENSG00000141837	798.352	-1.15383	0.0776564	-14.8581	6.16492e-50	3.67232e-47	protein_coding	CACNA1A
ENSG00000168060	22.4404	-1.15799	0.437953	-2.6441	0.00819096	0.0460041	protein_coding	NAALADL1
ENSG00000163145	23.1114	-1.15934	0.405023	-2.8624	0.00420439	0.0271201	protein_coding	C1QTNF7
ENSG00000261649	41.3879	-1.15965	0.322405	-3.59689	0.00032205	0.00325592	protein_coding	GOLGA6L7
ENSG00000284364	30.6994	-1.16029	0.358301	-3.23831	0.0012024	0.00980622	miRNA	MIR6824
ENSG00000240873	24.1119	-1.16085	0.404226	-2.87179	0.00408152	0.0265134	processed_pseudogene	RPS29P22
ENSG00000127418	3150.73	-1.16231	0.046757	-24.8586	2.08659e-136	3.65571e-133	protein_coding	FGFRL1
ENSG00000286224	48.842	-1.1661	0.335235	-3.47846	0.000504313	0.00475933	protein_coding	ENSG00000286224
ENSG00000100078	45.4433	-1.16821	0.292956	-3.98767	6.67253e-05	0.000848206	protein_coding	PLA2G3
ENSG00000139899	57.7833	-1.17335	0.300318	-3.90701	9.34435e-05	0.00112677	protein_coding	CBLN3
ENSG00000145936	31.3424	-1.17354	0.376942	-3.11333	0.00184992	0.0140092	protein_coding	KCNMB1
ENSG00000145506	536.66	-1.17399	0.0946366	-12.4053	2.44637e-35	8.27986e-33	protein_coding	NKD2
ENSG00000259920	32.0172	-1.1753	0.347607	-3.38112	0.000721903	0.00643554	lncRNA	ENSG00000259920
ENSG00000285671	40.3199	-1.1761	0.311859	-3.77125	0.000162434	0.00182702	lncRNA	ENSG00000285671
ENSG00000111181	36.3825	-1.17741	0.331451	-3.55229	0.00038189	0.00376007	protein_coding	SLC6A12
ENSG00000278189	94.1869	-1.17752	0.24303	-4.84518	1.26497e-06	2.59296e-05	rRNA	RNA5-8SN1
ENSG00000286970	22.774	-1.17796	0.410806	-2.86745	0.00413796	0.0268099	lncRNA	ENSG00000286970
ENSG00000273387	40.2694	-1.17958	0.31225	-3.77767	0.000158304	0.00178528	lncRNA	ENSG00000273387
ENSG00000288778	21.7696	-1.1818	0.427948	-2.76156	0.00575266	0.0348388	lncRNA	ENSG00000288778
ENSG00000130600	2273.38	-1.18318	0.0697613	-16.9604	1.61327e-64	1.29864e-61	lncRNA	H19
ENSG00000104879	70.0414	-1.18419	0.248033	-4.77432	1.80314e-06	3.5519e-05	protein_coding	CKM
ENSG00000188037	34.4885	-1.18885	0.349278	-3.40374	0.000664711	0.00601938	protein_coding	CLCN1
ENSG00000206885	19.2079	-1.19116	0.451793	-2.63651	0.00837627	0.0467525	snoRNA	SNORA75
ENSG00000174407	30.2381	-1.19131	0.353835	-3.36685	0.000760332	0.00671382	lncRNA	MIR1-1HG
ENSG00000246100	67.321	-1.19249	0.242625	-4.91495	8.88029e-07	1.89139e-05	lncRNA	LINC00900
ENSG00000112936	42.813	-1.20233	0.296846	-4.05034	5.11441e-05	0.00067641	protein_coding	C7
ENSG00000158406	58.1191	-1.20411	0.279772	-4.3039	1.67815e-05	0.000259108	protein_coding	H4C8
ENSG00000260558	27.9203	-1.21046	0.374485	-3.23233	0.00122784	0.00997814	lncRNA	ENSG00000260558
ENSG00000277027	56.9734	-1.21242	0.270727	-4.47839	7.52092e-06	0.00012677	ribozyme	RMRP
ENSG00000234595	30.0856	-1.21579	0.359729	-3.37973	0.000725582	0.00646162	lncRNA	ENSG00000234595
ENSG00000225614	173.755	-1.21841	0.157704	-7.7259	1.11066e-14	8.61455e-13	protein_coding	ZNF469
ENSG00000267708	19.5255	-1.22513	0.452726	-2.70611	0.00680757	0.0398735	transcribed_unprocessed_pseudogene	RDM1P3
ENSG00000143816	235.127	-1.22534	0.143252	-8.55375	1.19154e-17	1.24087e-15	protein_coding	WNT9A
ENSG00000124493	1233.67	-1.22823	0.0667732	-18.3941	1.46457e-75	1.50416e-72	protein_coding	GRM4
ENSG00000136250	69.8796	-1.22906	0.252919	-4.85949	1.17688e-06	2.4308e-05	protein_coding	AOAH
ENSG00000279827	202.744	-1.23112	0.36015	-3.41836	0.000629992	0.00575926	TEC	ENSG00000279827
ENSG00000104044	251.003	-1.23116	0.138386	-8.89662	5.75735e-19	6.64639e-17	protein_coding	OCA2
ENSG00000115596	27.5732	-1.23637	0.408296	-3.02813	0.00246071	0.0176417	protein_coding	WNT6
ENSG00000284503	575.827	-1.23989	0.331529	-3.7399	0.000184092	0.00202624	miRNA	MIR3652
ENSG00000250167	31.8679	-1.24058	0.354958	-3.495	0.000474061	0.00452546	lncRNA	ENSG00000250167
ENSG00000183091	8753.4	-1.24059	0.094221	-13.1668	1.36287e-39	5.48537e-37	protein_coding	NEB
ENSG00000250734	52.9369	-1.24888	0.30276	-4.12499	3.70755e-05	0.000509109	lncRNA	ENSG00000250734
ENSG00000205632	62.4776	-1.24985	0.257168	-4.86007	1.17343e-06	2.42535e-05	lncRNA	LINC01310
ENSG00000101336	43.0254	-1.25457	0.315691	-3.97406	7.06582e-05	0.000889469	protein_coding	HCK
ENSG00000275266	280.812	-1.25577	0.144788	-8.67317	4.20257e-18	4.53512e-16	misc_RNA	ENSG00000275266
ENSG00000165197	176.915	-1.25593	0.151383	-8.29638	1.07333e-16	1.00213e-14	protein_coding	VEGFD
ENSG00000275591	30.9501	-1.25785	0.360956	-3.48477	0.000492568	0.00467069	protein_coding	XKR5
ENSG00000289755	97.6163	-1.2688	0.234601	-5.40835	6.36072e-08	1.83218e-06	lncRNA	ENSG00000289755
ENSG00000125878	81.0619	-1.27134	0.236711	-5.37084	7.83727e-08	2.19316e-06	protein_coding	TCF15
ENSG00000136011	19.3922	-1.27218	0.463832	-2.74276	0.00609252	0.0365477	protein_coding	STAB2
ENSG00000127743	40.2224	-1.2774	0.350074	-3.64893	0.000263334	0.00275585	protein_coding	IL17B
ENSG00000138131	506.623	-1.28245	0.0957439	-13.3945	6.50711e-41	2.72969e-38	protein_coding	LOXL4
ENSG00000257951	44.5309	-1.28298	0.303994	-4.22041	2.4386e-05	0.000355688	lncRNA	ENSG00000257951
ENSG00000187905	24.4084	-1.28443	0.408495	-3.1443	0.00166487	0.012833	protein_coding	LRRC74B
ENSG00000260971	21.2845	-1.28985	0.426232	-3.02617	0.00247673	0.0177239	lncRNA	ENSG00000260971
ENSG00000172183	61.4236	-1.30188	0.25792	-5.04763	4.47336e-07	1.02331e-05	protein_coding	ISG20
ENSG00000066056	63.1908	-1.30441	0.246227	-5.2976	1.17335e-07	3.15048e-06	protein_coding	TIE1
ENSG00000290536	24.8499	-1.31436	0.398845	-3.29541	0.000982777	0.00831327	lncRNA	ENSG00000290536
ENSG00000109193	38.9253	-1.32172	0.319362	-4.13864	3.49365e-05	0.000483752	protein_coding	SULT1E1
ENSG00000232396	72.8824	-1.32179	0.241449	-5.47443	4.38924e-08	1.31123e-06	lncRNA	CABP7-DT
ENSG00000269584	18.5157	-1.32276	0.468692	-2.82223	0.00476909	0.0300238	transcribed_processed_pseudogene	CRIPTOP7
ENSG00000173714	125.586	-1.32547	0.181675	-7.29584	2.96795e-13	1.93007e-11	protein_coding	WFIKKN2
ENSG00000070031	27.7083	-1.32714	0.385994	-3.43825	0.000585494	0.00541227	protein_coding	SCT
ENSG00000280660	67.9397	-1.33096	0.256992	-5.179	2.2308e-07	5.58338e-06	lncRNA	ENSG00000280660
ENSG00000284695	20.1313	-1.33411	0.435741	-3.06171	0.00220078	0.016121	protein_coding	ENSG00000284695
ENSG00000280266	16.9453	-1.33918	0.513093	-2.61002	0.00905363	0.0495504	TEC	ENSG00000280266
ENSG00000278635	49.9909	-1.34072	0.282646	-4.74346	2.10098e-06	4.07659e-05	unprocessed_pseudogene	ENSG00000278635
ENSG00000252139	28.6664	-1.34232	0.415478	-3.23079	0.00123449	0.0100267	scaRNA	ENSG00000252139
ENSG00000101331	190.382	-1.34551	0.15712	-8.5636	1.09399e-17	1.14328e-15	protein_coding	CCM2L
ENSG00000205890	18.3394	-1.34793	0.468367	-2.87794	0.00400287	0.0260935	lncRNA	ENSG00000205890
ENSG00000086967	76.2723	-1.34886	0.256523	-5.25826	1.45427e-07	3.79615e-06	protein_coding	MYBPC2
ENSG00000267295	21.5411	-1.35949	0.435416	-3.12227	0.00179464	0.0136774	unprocessed_pseudogene	ENSG00000267295
ENSG00000229887	24.3775	-1.36334	0.404699	-3.36878	0.000755019	0.00667681	transcribed_unprocessed_pseudogene	HNRNPA1P6
ENSG00000118492	25.5379	-1.36374	0.396347	-3.44077	0.000580056	0.00536701	protein_coding	ADGB
ENSG00000159674	560.854	-1.36611	0.092828	-14.7166	5.04424e-49	2.78218e-46	protein_coding	SPON2
ENSG00000261399	15.4382	-1.36709	0.511515	-2.67262	0.00752607	0.0430644	lncRNA	MAPK8IP3-AS1
ENSG00000259555	61.45	-1.37061	0.251443	-5.45098	5.00918e-08	1.47058e-06	lncRNA	ENSG00000259555
ENSG00000110455	47.9281	-1.37068	0.293394	-4.6718	2.98577e-06	5.57543e-05	protein_coding	ACCS
ENSG00000225899	15.8224	-1.37221	0.510079	-2.69018	0.00714134	0.0413166	protein_coding	FRG2B
ENSG00000228566	117.322	-1.37236	0.19618	-6.99543	2.64446e-12	1.56275e-10	lncRNA	ENSG00000228566
ENSG00000290907	120.136	-1.37311	0.1827	-7.51565	5.66285e-14	4.06416e-12	lncRNA	ENSG00000290907
ENSG00000196502	112.401	-1.37419	0.213565	-6.43455	1.23839e-10	5.77216e-09	protein_coding	SULT1A1
ENSG00000285254	17.5504	-1.37565	0.50571	-2.72024	0.0065234	0.0385425	transcribed_unitary_pseudogene	ENSG00000285254
ENSG00000282885	32075.8	-1.37752	0.37158	-3.70719	0.000209573	0.00226732	lncRNA	ENSG00000282885
ENSG00000139549	28.2139	-1.37784	0.382448	-3.60268	0.00031495	0.00319498	protein_coding	DHH
ENSG00000274012	32063.6	-1.37816	0.371563	-3.7091	0.000207997	0.00225436	misc_RNA	RN7SL2
ENSG00000130208	143.211	-1.38384	0.178774	-7.74071	9.88627e-15	7.70819e-13	protein_coding	APOC1
ENSG00000165025	264.933	-1.38874	0.138749	-10.009	1.39102e-23	2.22743e-21	protein_coding	SYK
ENSG00000242512	93.8394	-1.39903	0.213345	-6.5576	5.4682e-11	2.71895e-09	lncRNA	LINC01206
ENSG00000237636	540.491	-1.39969	0.0942693	-14.8478	7.19186e-50	4.20005e-47	transcribed_unprocessed_pseudogene	ANKRD26P3
ENSG00000042980	202.531	-1.40392	0.150982	-9.29855	1.42376e-20	1.84371e-18	protein_coding	ADAM28
ENSG00000174332	102.343	-1.40427	0.215802	-6.50722	7.65565e-11	3.70758e-09	protein_coding	GLIS1
ENSG00000080618	56.4138	-1.40573	0.265211	-5.30042	1.15539e-07	3.10579e-06	protein_coding	CPB2
ENSG00000286186	19.848	-1.40757	0.47343	-2.97314	0.0029477	0.020351	lncRNA	ENSG00000286186
ENSG00000283294	19.3717	-1.41101	0.510989	-2.76133	0.00575657	0.0348464
ENSG00000197406	27.679	-1.4179	0.387392	-3.66011	0.000252112	0.0026552	protein_coding	DIO3
ENSG00000170439	53.6346	-1.41794	0.291048	-4.87183	1.10569e-06	2.30133e-05	protein_coding	TMT1B
ENSG00000214018	21.3841	-1.41885	0.442216	-3.20851	0.00133425	0.0106769	processed_pseudogene	RRM2P3
ENSG00000184434	40.737	-1.42774	0.331365	-4.30866	1.6425e-05	0.000254163	protein_coding	LRRC19
ENSG00000253125	15.7605	-1.4295	0.509705	-2.80456	0.00503854	0.0313556	lncRNA	ENSG00000253125
ENSG00000196589	14.7988	-1.43014	0.532291	-2.68677	0.00721468	0.0416761	protein_coding	MBD3L2B
ENSG00000275215	80.4408	-1.43656	0.263397	-5.45397	4.92574e-08	1.44969e-06	rRNA	RNA5-8SN3
ENSG00000286058	16.438	-1.43914	0.497203	-2.89447	0.003798	0.0249933	lncRNA	ENSG00000286058
ENSG00000136155	18.9348	-1.44165	0.499151	-2.8882	0.00387454	0.0253954	protein_coding	SCEL
ENSG00000217512	14.256	-1.44663	0.536875	-2.69454	0.00704858	0.040899	processed_pseudogene	ENSG00000217512
ENSG00000105357	15.3736	-1.44975	0.531134	-2.72954	0.0063422	0.0376888	protein_coding	MYH14
ENSG00000116396	1287.41	-1.45199	0.0666031	-21.8006	2.28937e-105	2.96464e-102	protein_coding	KCNC4
ENSG00000072657	2859.58	-1.45289	0.0486328	-29.8747	4.18934e-196	1.0398e-192	protein_coding	TRHDE
ENSG00000225345	58.8695	-1.45411	0.26242	-5.54117	3.00453e-08	9.21596e-07	transcribed_unprocessed_pseudogene	SNX18P3
ENSG00000283638	21.0141	-1.45453	0.500289	-2.90738	0.00364474	0.0241501	lncRNA	MIR106AHG
ENSG00000275239	13.4896	-1.45505	0.553578	-2.62844	0.00857774	0.0476108	lncRNA	FAM242F
ENSG00000184599	16.4855	-1.45767	0.512687	-2.84321	0.00446621	0.0284538	protein_coding	TAFA3
ENSG00000249620	13.7066	-1.47552	0.538172	-2.74173	0.00611166	0.0366257	transcribed_processed_pseudogene	H3P18
ENSG00000071909	24.9909	-1.47742	0.406589	-3.63369	0.000279397	0.00289165	protein_coding	MYO3B
ENSG00000227392	17.482	-1.478	0.514706	-2.87154	0.00408479	0.0265289	lncRNA	HPN-AS1
ENSG00000289402	73.9938	-1.47904	0.237688	-6.2226	4.88968e-10	2.05698e-08	lncRNA	ENSG00000289402
ENSG00000230928	43.3409	-1.48185	0.308036	-4.81065	1.50437e-06	3.01521e-05	lncRNA	ENSG00000230928
ENSG00000105675	38.0589	-1.48318	0.328861	-4.51004	6.48143e-06	0.000110944	protein_coding	ATP4A
ENSG00000243566	15.0531	-1.49011	0.513938	-2.8994	0.00373875	0.0246688	protein_coding	UPK3B
ENSG00000281655	13.4654	-1.49409	0.572844	-2.6082	0.00910188	0.0497687	lncRNA	ENSG00000281655
ENSG00000261868	19.5152	-1.50266	0.470262	-3.19537	0.00139649	0.0110856	processed_pseudogene	MFSD1P1
ENSG00000188511	16.9008	-1.50387	0.497293	-3.02411	0.00249366	0.0178194	lncRNA	MIR3667HG
ENSG00000278505	12.8894	-1.5094	0.565592	-2.6687	0.00761455	0.0434384	protein_coding	C17orf78
ENSG00000254802	14.1193	-1.50953	0.530484	-2.84558	0.00443311	0.0283068	lncRNA	ENSG00000254802
ENSG00000274917	46.6728	-1.51681	0.364419	-4.16227	3.15101e-05	0.000442479
ENSG00000104826	31.5861	-1.51725	0.363264	-4.17672	2.95742e-05	0.000419148	protein_coding	LHB
ENSG00000227963	15.6184	-1.51824	0.53208	-2.85341	0.00432529	0.0277221	lncRNA	RBM15-AS1
ENSG00000225098	33.0783	-1.53028	0.360445	-4.24553	2.18074e-05	0.000323301	transcribed_unprocessed_pseudogene	BCRP1
ENSG00000075290	19.5611	-1.53335	0.479245	-3.19951	0.0013766	0.0109598	protein_coding	WNT8B
ENSG00000273532	984.327	-1.53386	0.200845	-7.63703	2.2229e-14	1.66768e-12
ENSG00000224976	134.121	-1.54232	0.195467	-7.89046	3.01079e-15	2.44342e-13	unprocessed_pseudogene	PARP4P2
ENSG00000280202	35.1117	-1.54761	0.355504	-4.3533	1.34104e-05	0.000212341	TEC	ENSG00000280202
ENSG00000100628	46.547	-1.55265	0.301706	-5.14625	2.65752e-07	6.49849e-06	protein_coding	ASB2
ENSG00000264843	137.509	-1.55728	0.189095	-8.23544	1.78895e-16	1.6496e-14	lncRNA	ENSG00000264843
ENSG00000038295	100.629	-1.55788	0.208147	-7.4845	7.18223e-14	5.08113e-12	protein_coding	TLL1
ENSG00000258853	21.1905	-1.5622	0.451475	-3.46021	0.000539761	0.00504274	lncRNA	ENSG00000258853
ENSG00000099960	207.253	-1.56407	0.142014	-11.0135	3.28987e-28	7.59578e-26	protein_coding	SLC7A4
ENSG00000231184	33.8067	-1.56935	0.374535	-4.19014	2.78781e-05	0.00039813	processed_pseudogene	CCNQP3
ENSG00000146700	191.368	-1.57195	0.15779	-9.96229	2.22862e-23	3.51203e-21	protein_coding	SSC4D
ENSG00000280604	65.9434	-1.58274	0.259763	-6.093	1.10814e-09	4.38895e-08	lncRNA	ENSG00000280604
ENSG00000240219	19.1463	-1.59748	0.460137	-3.47176	0.000517056	0.00486111	lncRNA	ENSG00000240219
ENSG00000180739	18.4297	-1.60341	0.467661	-3.42858	0.000606749	0.00557416	protein_coding	S1PR5
ENSG00000226872	50.2572	-1.6151	0.287444	-5.61885	1.92235e-08	6.09098e-07	lncRNA	ENSG00000226872
ENSG00000016082	57.297	-1.61872	0.266787	-6.06747	1.29943e-09	5.06157e-08	protein_coding	ISL1
ENSG00000130038	98.254	-1.62275	0.203859	-7.96014	1.7185e-15	1.43372e-13	protein_coding	CRACR2A
ENSG00000108405	25.9293	-1.62668	0.417699	-3.8944	9.84425e-05	0.00118274	protein_coding	P2RX1
ENSG00000196169	303.192	-1.62939	0.134307	-12.1318	7.16537e-34	2.31971e-31	protein_coding	KIF19
ENSG00000139287	57.942	-1.63136	0.29007	-5.62402	1.86569e-08	5.93672e-07	protein_coding	TPH2
ENSG00000230630	104.809	-1.63837	0.203066	-8.06815	7.13716e-16	6.16154e-14	lncRNA	DNM3OS
ENSG00000157554	27.4762	-1.63904	0.396357	-4.13525	3.54563e-05	0.000489811	protein_coding	ERG
ENSG00000284010	220.678	-1.64078	0.15237	-10.7684	4.85545e-27	1.01129e-24	miRNA	MIR675
ENSG00000279474	17.8685	-1.66101	0.477274	-3.48021	0.000501029	0.00473584	TEC	ENSG00000279474
ENSG00000111452	73.4086	-1.66245	0.236371	-7.03322	2.01827e-12	1.2095e-10	protein_coding	ADGRD1
ENSG00000182315	14.623	-1.66526	0.53514	-3.11182	0.0018594	0.0140547	protein_coding	MBD3L3
ENSG00000258099	13.2102	-1.66584	0.556893	-2.99131	0.0027778	0.0194257	lncRNA	ATXN2-AS
ENSG00000173040	17.7334	-1.67723	0.497788	-3.36936	0.000753423	0.00666665	protein_coding	EVC2
ENSG00000224356	36.7238	-1.67832	0.338328	-4.96063	7.02638e-07	1.52866e-05	lncRNA	ENSG00000224356
ENSG00000172818	19.7495	-1.67972	0.476556	-3.52471	0.000423943	0.00411385	protein_coding	OVOL1
ENSG00000285636	22.8229	-1.6848	0.439347	-3.83478	0.000125676	0.00146034	lncRNA	ENSG00000285636
ENSG00000136449	25.7651	-1.68541	0.439514	-3.8347	0.000125716	0.00146034	protein_coding	MYCBPAP
ENSG00000287364	14.2889	-1.70142	0.593178	-2.8683	0.00412679	0.0267549	lncRNA	ENSG00000287364
ENSG00000123454	136.483	-1.70412	0.174801	-9.74893	1.86414e-22	2.79003e-20	protein_coding	DBH
ENSG00000150175	29.2229	-1.70555	0.393664	-4.3325	1.47426e-05	0.000230655	transcribed_unprocessed_pseudogene	FRMPD2B
ENSG00000229688	25.1464	-1.70566	0.449374	-3.79563	0.000147269	0.0016763	lncRNA	CRPPA-AS1
ENSG00000273179	47.975	-1.70595	0.300723	-5.67283	1.4046e-08	4.56708e-07	lncRNA	ENSG00000273179
ENSG00000242439	12.2804	-1.70754	0.596717	-2.86156	0.0042156	0.0271593	processed_pseudogene	ENSG00000242439
ENSG00000273036	40.6897	-1.71055	0.326935	-5.23209	1.67607e-07	4.32583e-06	transcribed_processed_pseudogene	CYP4F33P
ENSG00000289112	56.5589	-1.72577	0.270084	-6.38977	1.66134e-10	7.5544e-09	lncRNA	ENSG00000289112
ENSG00000129910	282.997	-1.7428	0.135492	-12.8628	7.287e-38	2.78251e-35	protein_coding	CDH15
ENSG00000154783	357.889	-1.74568	0.123218	-14.1674	1.45726e-45	7.11524e-43	protein_coding	FGD5
ENSG00000227879	1036.33	-1.76348	0.0773534	-22.7977	4.8299e-115	7.19269e-112	transcribed_unprocessed_pseudogene	PSPC1P1
ENSG00000283844	13.4726	-1.76933	0.585129	-3.02382	0.00249601	0.0178319	miRNA	MIR214
ENSG00000250637	9.92679	-1.77215	0.661979	-2.67705	0.00742729	0.0426314	unprocessed_pseudogene	ENSG00000250637
ENSG00000236333	1810.31	-1.7765	0.0578868	-30.6892	7.923e-207	2.62198e-203	lncRNA	TRHDE-AS1
ENSG00000259910	15.8754	-1.78418	0.561435	-3.17789	0.00148353	0.0116677	lncRNA	LNCPTCTS
ENSG00000149451	21.9994	-1.78539	0.452763	-3.94331	8.03633e-05	0.000994408	protein_coding	ADAM33
ENSG00000259001	23.5793	-1.79606	0.450331	-3.98831	6.65446e-05	0.000846792	lncRNA	ENSG00000259001
ENSG00000230433	26.1703	-1.79752	0.403314	-4.45688	8.31605e-06	0.000138217	lncRNA	ENSG00000230433
ENSG00000259271	34.5666	-1.79947	0.352675	-5.10235	3.35457e-07	7.92327e-06	transcribed_unprocessed_pseudogene	ANKRD62P1
ENSG00000273244	24.152	-1.80206	0.413663	-4.35636	1.32246e-05	0.000210407	lncRNA	ENSG00000273244
ENSG00000205329	14.2967	-1.80621	0.54315	-3.32543	0.000882828	0.00759288	protein_coding	OR6C3
ENSG00000260442	372.13	-1.80761	0.130135	-13.8902	7.25959e-44	3.37843e-41	lncRNA	ATP2A1-AS1
ENSG00000158516	37.1891	-1.81264	0.353816	-5.12312	3.00523e-07	7.21256e-06	protein_coding	CPA2
ENSG00000157654	7978.94	-1.81446	0.0391704	-46.3223	0	0	protein_coding	PALM2AKAP2
ENSG00000252172	12.4917	-1.83515	0.596383	-3.07713	0.00209007	0.0154968	snRNA	RNU6-720P
ENSG00000283152	12.6621	-1.8476	0.628603	-2.93922	0.00329039	0.0221922	miRNA	MIR3120
ENSG00000287922	39.8197	-1.851	0.340998	-5.4282	5.69254e-08	1.65411e-06	lncRNA	ENSG00000287922
ENSG00000106511	28.2856	-1.87116	0.410647	-4.55661	5.19855e-06	9.12933e-05	protein_coding	MEOX2
ENSG00000132958	1022.4	-1.87132	0.0745896	-25.0882	6.69146e-139	1.24561e-135	protein_coding	TPTE2
ENSG00000277209	19.4904	-1.88658	0.498941	-3.78116	0.000156097	0.00176239	ribozyme	RPPH1
ENSG00000231419	60.0346	-1.88671	0.294491	-6.40669	1.48712e-10	6.84583e-09	lncRNA	LINC00689
ENSG00000196296	2031.78	-1.88995	0.0610652	-30.9498	2.55766e-210	9.52217e-207	protein_coding	ATP2A1
ENSG00000279904	10.3375	-1.89466	0.649036	-2.9192	0.00350936	0.0233884
ENSG00000157303	13.4088	-1.90055	0.57086	-3.32927	0.000870738	0.00750841	protein_coding	SUSD3
ENSG00000115297	78.8726	-1.9134	0.239897	-7.97593	1.5124e-15	1.26888e-13	protein_coding	TLX2
ENSG00000257870	27.4936	-1.91794	0.40834	-4.69692	2.64113e-06	4.985e-05	lncRNA	ENSG00000257870
ENSG00000239783	21.0649	-1.92328	0.474951	-4.04943	5.13436e-05	0.000678446	processed_pseudogene	RPL27AP9
ENSG00000282390	10.7419	-1.93115	0.656945	-2.9396	0.00328641	0.0221704	lncRNA	ENSG00000282390
ENSG00000290799	8.31498	-1.93241	0.731508	-2.64168	0.00824967	0.046212	lncRNA	ENSG00000290799
ENSG00000233523	32.9268	-1.93727	0.384748	-5.03515	4.77481e-07	1.08559e-05	processed_pseudogene	PHB1P5
ENSG00000109101	14.367	-1.95814	0.590189	-3.31782	0.000907235	0.00777809	protein_coding	FOXN1
ENSG00000010379	54.3752	-1.96384	0.288777	-6.80055	1.04222e-11	5.73782e-10	protein_coding	SLC6A13
ENSG00000260403	24.2789	-1.97093	0.451674	-4.3636	1.27941e-05	0.000204102	lncRNA	ENSG00000260403
ENSG00000259256	9.34287	-1.97576	0.693972	-2.84704	0.00441283	0.0281921	lncRNA	LINC01895
ENSG00000288108	24.4726	-1.97919	0.437656	-4.52225	6.11843e-06	0.000105519	lncRNA	ENSG00000288108
ENSG00000228358	10.2222	-1.98228	0.655405	-3.02451	0.00249034	0.0178042
ENSG00000207737	7.78339	-2.00623	0.769406	-2.6075	0.00912062	0.0498529	miRNA	MIR181B2
ENSG00000133048	15.863	-2.00848	0.552947	-3.63231	0.000280897	0.00290595	protein_coding	CHI3L1
ENSG00000106018	171.096	-2.01435	0.164218	-12.2663	1.37316e-34	4.54426e-32	protein_coding	VIPR2
ENSG00000250105	16.6411	-2.01925	0.532077	-3.79504	0.00014762	0.00167942	lncRNA	ENSG00000250105
ENSG00000248994	122.904	-2.02228	0.196172	-10.3087	6.4352e-25	1.16161e-22	lncRNA	ENSG00000248994
ENSG00000253301	36.2385	-2.03427	0.349132	-5.82665	5.65502e-09	1.97919e-07	lncRNA	LINC01606
ENSG00000266733	8.86449	-2.03534	0.724615	-2.80886	0.0049717	0.0310109	transcribed_unprocessed_pseudogene	TBC1D29P
ENSG00000115919	35.6026	-2.04055	0.349368	-5.84069	5.1984e-09	1.83664e-07	protein_coding	KYNU
ENSG00000091010	20.2038	-2.04294	0.497431	-4.10699	4.00852e-05	0.000546406	protein_coding	POU4F3
ENSG00000254777	21.4405	-2.05335	0.490349	-4.18753	2.82002e-05	0.000401873	lncRNA	ENSG00000254777
ENSG00000221540	8.20378	-2.05458	0.728311	-2.82101	0.00478721	0.0301188	miRNA	MIR1180
ENSG00000235590	141.17	-2.055	0.182797	-11.242	2.53625e-29	6.34787e-27	lncRNA	GNAS-AS1
ENSG00000237759	12.2785	-2.05516	0.599242	-3.4296	0.000604462	0.00555657	lncRNA	ENSG00000237759
ENSG00000161640	111.535	-2.07332	0.205063	-10.1107	4.95529e-24	8.33832e-22	protein_coding	SIGLEC11
ENSG00000289429	14.8204	-2.07771	0.561627	-3.69945	0.000216069	0.00233082	lncRNA	ENSG00000289429
ENSG00000287645	8.99169	-2.08018	0.783018	-2.65662	0.00789281	0.0446919	lncRNA	ENSG00000287645
ENSG00000228915	30.9275	-2.08563	0.389561	-5.35379	8.61322e-08	2.39083e-06	transcribed_unprocessed_pseudogene	OR7E128P
ENSG00000258896	17.8202	-2.09743	0.517537	-4.05271	5.06268e-05	0.000670461	processed_pseudogene	SCOCP1
ENSG00000226985	33.0421	-2.10572	0.37571	-5.60464	2.08684e-08	6.59113e-07	lncRNA	LINC01203
ENSG00000132855	123.028	-2.10676	0.209918	-10.0361	1.05776e-23	1.7122e-21	protein_coding	ANGPTL3
ENSG00000260541	51.5104	-2.13499	0.31445	-6.78962	1.12431e-11	6.17832e-10	lncRNA	ENSG00000260541
ENSG00000184144	8528.14	-2.13905	0.0422298	-50.6526	0	0	protein_coding	CNTN2
ENSG00000276592	50.9868	-2.14067	0.315841	-6.77768	1.22117e-11	6.69821e-10	processed_pseudogene	PHB1P6
ENSG00000241717	43.1211	-2.14235	0.329871	-6.49452	8.32988e-11	4.00157e-09	transcribed_unprocessed_pseudogene	VWFP1
ENSG00000256925	608.224	-2.16247	0.0926373	-23.3433	1.61029e-120	2.52426e-117	lncRNA	ADGRA1-AS1
ENSG00000104804	9.55952	-2.16552	0.702026	-3.08467	0.00203779	0.015162	protein_coding	TULP2
ENSG00000189295	28.8165	-2.17794	0.398996	-5.45856	4.80022e-08	1.41976e-06	lncRNA	ANKRD62P1-PARP4P3
ENSG00000148702	11.4288	-2.1983	0.646696	-3.39929	0.000675619	0.00609776	protein_coding	HABP2
ENSG00000105479	156.809	-2.20287	0.176098	-12.5094	6.63633e-36	2.32537e-33	protein_coding	ODAD1
ENSG00000157227	1355.98	-2.20765	0.0675649	-32.6745	3.59306e-234	1.5288e-230	protein_coding	MMP14
ENSG00000217643	8.01252	-2.20891	0.76071	-2.90375	0.00368718	0.0243771	transcribed_processed_pseudogene	PTGES3P2
ENSG00000286739	8.04737	-2.20982	0.780453	-2.83146	0.00463367	0.02932	lncRNA	ENSG00000286739
ENSG00000196990	134.303	-2.2206	0.194946	-11.3909	4.64389e-30	1.22401e-27	protein_coding	FAM163B
ENSG00000281103	32.82	-2.22416	0.398019	-5.58809	2.29587e-08	7.20821e-07	lncRNA	TRG-AS1
ENSG00000181234	334.048	-2.23625	0.122578	-18.2435	2.33043e-74	2.31365e-71	protein_coding	TMEM132C
ENSG00000268108	15.5293	-2.25043	0.54793	-4.10714	4.00585e-05	0.000546293	lncRNA	ENSG00000268108
ENSG00000236834	48.5253	-2.25866	0.314384	-7.18441	6.74984e-13	4.2683e-11	lncRNA	LINC00421
ENSG00000169174	152.163	-2.26864	0.178198	-12.731	3.97643e-37	1.42692e-34	protein_coding	PCSK9
ENSG00000184908	33.0373	-2.27266	0.392761	-5.78637	7.19223e-09	2.4679e-07	protein_coding	CLCNKB
ENSG00000266524	310.573	-2.28357	0.127863	-17.8595	2.43939e-71	2.13691e-68	protein_coding	GDF10
ENSG00000274866	144.985	-2.28514	0.357676	-6.38886	1.67127e-10	7.57642e-09	misc_RNA	ENSG00000274866
ENSG00000167755	8.37729	-2.30731	0.838334	-2.75226	0.00591861	0.0356697	protein_coding	KLK6
ENSG00000258987	10.4266	-2.31919	0.667577	-3.47404	0.000512685	0.00482306	lncRNA	ENSG00000258987
ENSG00000254337	17.3498	-2.32363	0.536625	-4.33008	1.49057e-05	0.000232678	lncRNA	ENSG00000254337
ENSG00000175591	26.9795	-2.34245	0.42165	-5.55543	2.76928e-08	8.54717e-07	protein_coding	P2RY2
ENSG00000248550	42.6283	-2.34488	0.337535	-6.94706	3.72988e-12	2.1613e-10	lncRNA	OTX2-AS1
ENSG00000087116	259.131	-2.35569	0.152461	-15.4511	7.41717e-54	4.70028e-51	protein_coding	ADAMTS2
ENSG00000262648	28.8442	-2.36082	0.425619	-5.54681	2.90934e-08	8.95163e-07	processed_pseudogene	PHB1P15
ENSG00000259663	36.1668	-2.3647	0.372706	-6.34467	2.22897e-10	9.89385e-09	lncRNA	ISL1-DT
ENSG00000225349	8.91768	-2.38813	0.73457	-3.25107	0.00114973	0.00946217	processed_pseudogene	ANKRD49P2
ENSG00000280485	16.79	-2.39014	0.541222	-4.4162	1.00451e-05	0.000164117	lncRNA	ENSG00000280485
ENSG00000289153	8.10692	-2.39519	0.79404	-3.01646	0.00255748	0.0181535	lncRNA	ENSG00000289153
ENSG00000101306	34.6591	-2.40081	0.372709	-6.44153	1.18273e-10	5.54745e-09	protein_coding	MYLK2
ENSG00000221125	35.3757	-2.41233	0.388631	-6.20723	5.39263e-10	2.2495e-08	snoRNA	U3
ENSG00000240666	68.3177	-2.42373	0.277201	-8.74358	2.25836e-18	2.49122e-16	lncRNA	MME-AS1
ENSG00000283251	102.18	-2.42941	0.237589	-10.2253	1.52755e-24	2.66062e-22	transcribed_unprocessed_pseudogene	ENSG00000283251
ENSG00000291190	21.7026	-2.46224	0.489723	-5.02781	4.96115e-07	1.12282e-05	lncRNA	A2MP1
ENSG00000276351	596.983	-2.47481	0.305179	-8.10937	5.08845e-16	4.41849e-14
ENSG00000248746	166.849	-2.48953	0.17308	-14.3838	6.54409e-47	3.41946e-44	protein_coding	ACTN3
ENSG00000189108	108.263	-2.51123	0.216612	-11.5932	4.46051e-31	1.28982e-28	protein_coding	IL1RAPL2
ENSG00000104827	26.6235	-2.51959	0.460636	-5.4698	4.50547e-08	1.34057e-06	protein_coding	CGB3
ENSG00000260478	27.954	-2.52191	0.441829	-5.70789	1.14389e-08	3.77711e-07	lncRNA	ENSG00000260478
ENSG00000169181	228.49	-2.54437	0.151643	-16.7786	3.49818e-63	2.74184e-60	protein_coding	GSG1L
ENSG00000205436	9.72538	-2.55325	0.721737	-3.53765	0.000403712	0.0039488	protein_coding	EXOC3L4
ENSG00000267160	386.461	-2.56273	0.116398	-22.0169	1.98445e-107	2.68658e-104	lncRNA	ENSG00000267160
ENSG00000240520	18.1173	-2.6165	0.550276	-4.75489	1.98555e-06	3.87027e-05	transcribed_unitary_pseudogene	UOX
ENSG00000196549	734.185	-2.61709	0.0921947	-28.3866	2.96233e-177	6.30214e-174	protein_coding	MME
ENSG00000142319	1269.13	-2.62241	0.0707601	-37.0605	1.21731e-300	9.06409e-297	protein_coding	SLC6A3
ENSG00000197467	799.731	-2.62385	0.0863579	-30.3835	9.08215e-203	2.70503e-199	protein_coding	COL13A1
ENSG00000235431	10.2644	-2.63276	0.717572	-3.66898	0.000243516	0.00257742	lncRNA	ENSG00000235431
ENSG00000275661	226.56	-2.64361	0.433922	-6.09237	1.11254e-09	4.40053e-08
ENSG00000289447	34.895	-2.67398	0.388224	-6.88773	5.66878e-12	3.22828e-10	lncRNA	ENSG00000289447
ENSG00000258077	9.43336	-2.68264	0.746054	-3.59577	0.000323439	0.00326774	lncRNA	ENSG00000258077
ENSG00000157119	51.9793	-2.69298	0.759006	-3.54803	0.000388123	0.00381262	protein_coding	KLHL40
ENSG00000060558	8.44993	-2.71704	0.813432	-3.34022	0.00083713	0.00727124	protein_coding	GNA15
ENSG00000113430	840.803	-2.71821	0.0906251	-29.994	1.17345e-197	3.17727e-194	protein_coding	IRX4
ENSG00000255346	8.40685	-2.72727	0.790766	-3.44889	0.00056289	0.00523256	protein_coding	NOX5
ENSG00000257666	13.444	-2.73309	0.650942	-4.19867	2.68482e-05	0.000385929	processed_pseudogene	CBX3P5
ENSG00000251393	10.9902	-2.73841	0.691284	-3.96134	7.4531e-05	0.000930783	lncRNA	ENSG00000251393
ENSG00000283663	136.989	-2.75033	0.202101	-13.6087	3.55471e-42	1.5802e-39	protein_coding	ENSG00000283663
ENSG00000235784	26.0802	-2.76371	0.473911	-5.83171	5.48612e-09	1.92687e-07	processed_pseudogene	HNRNPA1P29
ENSG00000249326	16.1405	-2.77609	0.576359	-4.8166	1.46024e-06	2.94384e-05	lncRNA	CTD-2194D22.4
ENSG00000196337	195.603	-2.7797	0.170468	-16.3063	8.89917e-60	6.31078e-57	protein_coding	CGB7
ENSG00000237001	22.4902	-2.783	0.486869	-5.71611	1.08991e-08	3.60687e-07	lncRNA	WASF3-AS1
ENSG00000267335	13.9831	-2.80578	0.662085	-4.23779	2.25729e-05	0.000332828	protein_coding	ENSG00000267335
ENSG00000149633	173.204	-2.85435	0.179615	-15.8915	7.26209e-57	4.91578e-54	protein_coding	KIAA1755
ENSG00000277829	9.07772	-2.85767	0.790776	-3.61376	0.000301793	0.00308463	lncRNA	ENSG00000277829
ENSG00000288549	13.242	-2.87072	0.646653	-4.43935	9.02295e-06	0.000148969	lncRNA	ENSG00000288549
ENSG00000104818	11.0346	-2.92352	0.740094	-3.9502	7.80856e-05	0.000970256	protein_coding	CGB2
ENSG00000257979	8.08458	-2.92471	0.862681	-3.39025	0.000698285	0.00625872	processed_pseudogene	SNRPGP18
ENSG00000249116	139.977	-2.99124	0.207221	-14.435	3.11725e-47	1.65793e-44	lncRNA	IRX4-AS1
ENSG00000104848	52.1114	-3.02361	0.336014	-8.99848	2.28854e-19	2.72648e-17	protein_coding	KCNA7
ENSG00000102245	46.8775	-3.02382	0.37058	-8.15969	3.35896e-16	2.98637e-14	protein_coding	CD40LG
ENSG00000270832	26.8319	-3.05823	0.49586	-6.16754	6.93618e-10	2.85341e-08	processed_pseudogene	CMPK1P2
ENSG00000213030	53.4698	-3.06367	0.331604	-9.23896	2.48909e-20	3.15469e-18	protein_coding	CGB8
ENSG00000272181	43.4823	-3.13912	0.369756	-8.48968	2.07199e-17	2.11343e-15	lncRNA	ENSG00000272181
ENSG00000169508	28.045	-3.14037	0.460108	-6.82528	8.77554e-12	4.88543e-10	protein_coding	GPR183
ENSG00000273007	310.544	-3.17155	0.142319	-22.2847	5.19499e-110	7.36798e-107	lncRNA	ENSG00000273007
ENSG00000270541	11.1404	-3.17413	0.763582	-4.1569	3.226e-05	0.00045092	processed_pseudogene	ENSG00000270541
ENSG00000259200	15.1648	-3.25549	0.64248	-5.06707	4.03996e-07	9.33563e-06	lncRNA	ENSG00000259200
ENSG00000260779	8.63734	-3.30655	0.893837	-3.69928	0.000216211	0.0023315	lncRNA	ENSG00000260779
ENSG00000288565	51.0744	-3.34071	0.364305	-9.17009	4.72632e-20	5.91465e-18
ENSG00000255833	26.8653	-3.36657	0.488212	-6.89572	5.35921e-12	3.0637e-10	protein_coding	TIFAB
ENSG00000232517	41.4708	-3.37527	0.414364	-8.14567	3.77174e-16	3.34338e-14	transcribed_unitary_pseudogene	CSPG4BP
ENSG00000286393	9.28487	-3.41586	0.844754	-4.04361	5.26334e-05	0.000691197	lncRNA	ENSG00000286393
ENSG00000253726	48.7125	-3.41795	0.395946	-8.63235	6.01032e-18	6.39327e-16	lncRNA	ENSG00000253726
ENSG00000216835	9.48181	-3.44815	0.838657	-4.11151	3.9308e-05	0.000537287	processed_pseudogene	RBMXP1
ENSG00000291192	11.3705	-3.45499	0.78117	-4.42284	9.74111e-06	0.000159675
ENSG00000225950	62.81	-3.45537	0.330204	-10.4644	1.25937e-25	2.37399e-23	protein_coding	NTF4
ENSG00000237880	17.6385	-3.49714	0.627193	-5.57586	2.46307e-08	7.68972e-07	lncRNA	LINC01885
ENSG00000164694	527.548	-3.51431	0.119931	-29.3027	9.58052e-189	2.19497e-185	protein_coding	FNDC1
ENSG00000275191	119.978	-3.51531	0.246958	-14.2344	5.60165e-46	2.87654e-43	lncRNA	ENSG00000275191
ENSG00000238711	19.8393	-3.529	0.595929	-5.92185	3.18336e-09	1.17053e-07	misc_RNA	RNY4P25
ENSG00000251380	16.0237	-3.54538	0.667783	-5.30918	1.1012e-07	2.98435e-06	protein_coding	DCANP1
ENSG00000266900	20.507	-3.57823	0.58304	-6.13719	8.39921e-10	3.4082e-08	lncRNA	ENSG00000266900
ENSG00000252496	20.5205	-3.5879	0.598922	-5.9906	2.09074e-09	7.91239e-08	rRNA_pseudogene	RNA5SP33
ENSG00000189052	49.9135	-3.59523	0.381518	-9.42347	4.36406e-21	5.90815e-19	protein_coding	CGB5
ENSG00000286840	35.4203	-3.60131	0.462318	-7.78969	6.71726e-15	5.30681e-13	lncRNA	ENSG00000286840
ENSG00000236532	35.5179	-3.61419	0.451257	-8.00916	1.15495e-15	9.77246e-14	lncRNA	LINC01695
ENSG00000231023	67.8589	-3.62753	0.328854	-11.0308	2.71423e-28	6.36539e-26	lncRNA	LINC00326
ENSG00000261713	8.96177	-3.71943	0.911345	-4.08126	4.47928e-05	0.000604216	lncRNA	SSTR5-AS1
ENSG00000235879	18.3846	-3.76522	0.645843	-5.82993	5.54503e-09	1.94527e-07	processed_pseudogene	FAR1P1
ENSG00000211896	12.0878	-3.83709	0.800047	-4.79608	1.61803e-06	3.2192e-05	IG_C_gene	IGHG1
ENSG00000257612	26.887	-3.86043	0.545032	-7.08294	1.41125e-12	8.64867e-11	lncRNA	MIR4307HG
ENSG00000287026	9.86906	-3.86245	0.897237	-4.30483	1.67117e-05	0.000258165	lncRNA	ENSG00000287026
ENSG00000279786	99.6923	-3.8848	0.28978	-13.406	5.57497e-41	2.37207e-38	TEC	ENSG00000279786
ENSG00000201318	12.9457	-3.93953	0.788639	-4.99536	5.87276e-07	1.30982e-05	snoRNA	SNORD114-30
ENSG00000236790	16.594	-4.02992	0.717943	-5.61315	1.98675e-08	6.28835e-07	lncRNA	LINC00299
ENSG00000157766	663.573	-4.05233	0.117412	-34.5139	4.96734e-261	2.95895e-257	protein_coding	ACAN
ENSG00000258776	39.6973	-4.19906	0.480729	-8.73478	2.44122e-18	2.683e-16	lncRNA	ENSG00000258776
ENSG00000180219	12.9939	-4.27456	0.856473	-4.99088	6.01038e-07	1.33791e-05	protein_coding	GARIN6
ENSG00000211899	101.199	-4.39795	0.323232	-13.6062	3.6811e-42	1.61232e-39	IG_C_gene	IGHM
ENSG00000199567	10.7078	-4.43246	0.977678	-4.53366	5.79692e-06	0.000100615	misc_RNA	Y_RNA
ENSG00000285627	34.4089	-4.53023	0.557556	-8.12515	4.46813e-16	3.9026e-14	lncRNA	ENSG00000285627
ENSG00000162009	15.3709	-4.55702	0.846394	-5.38404	7.28321e-08	2.05809e-06	protein_coding	SSTR5
ENSG00000265425	19.5227	-4.56398	0.752017	-6.06898	1.28724e-09	5.02478e-08	lncRNA	ENSG00000265425
ENSG00000240097	16.0858	-4.60866	0.8313	-5.54392	2.95771e-08	9.09107e-07	processed_pseudogene	MTERF1P1
ENSG00000257658	17.32	-4.7191	0.824062	-5.72663	1.02447e-08	3.42391e-07	processed_pseudogene	ENSG00000257658
ENSG00000105967	86.5302	-4.72137	0.377782	-12.4976	7.69364e-36	2.6645e-33	protein_coding	TFEC
ENSG00000268287	13.2213	-4.72925	0.958886	-4.93203	8.13782e-07	1.75001e-05	lncRNA	ENSG00000268287
ENSG00000235514	53.5536	-4.7714	0.480162	-9.93706	2.87172e-23	4.38623e-21	processed_pseudogene	LLPHP2
ENSG00000253924	9.33644	-4.83706	1.15278	-4.19599	2.7168e-05	0.000389587	lncRNA	ENSG00000253924
ENSG00000104941	55.1888	-4.93479	0.494576	-9.97783	1.90585e-23	3.01936e-21	protein_coding	RSPH6A
ENSG00000274655	15.9595	-5.0218	0.940164	-5.34141	9.22281e-08	2.5458e-06	misc_RNA	ENSG00000274655
ENSG00000277448	81.1683	-5.15725	0.428672	-12.0307	2.44933e-33	7.84416e-31	lncRNA	LINC02338
ENSG00000286438	35.1582	-5.17007	0.658174	-7.85518	3.99212e-15	3.22226e-13	lncRNA	ENSG00000286438
ENSG00000236733	41.4654	-5.1921	0.607249	-8.5502	1.22872e-17	1.27513e-15	lncRNA	ENSG00000236733
ENSG00000277577	12.6458	-5.28269	1.11991	-4.71708	2.39257e-06	4.58681e-05	misc_RNA	ENSG00000277577
ENSG00000234170	57.8656	-5.30665	0.528125	-10.0481	9.36549e-24	1.52427e-21	lncRNA	LINC02645
ENSG00000270641	402.531	-5.3211	0.205226	-25.928	3.22148e-148	6.39656e-145	lncRNA	TSIX
ENSG00000273342	33.6242	-5.37556	0.7075	-7.59796	3.00842e-14	2.2234e-12	lncRNA	ENSG00000273342
ENSG00000197980	27.6848	-5.4117	0.795478	-6.80309	1.02402e-11	5.64804e-10	protein_coding	LEKR1
ENSG00000201012	21.5271	-5.47443	0.913039	-5.99584	2.02442e-09	7.69072e-08	misc_RNA	Y_RNA
ENSG00000226777	103.235	-5.50589	0.421059	-13.0763	4.49894e-39	1.78662e-36	lncRNA	FAM30A
ENSG00000248426	8.13123	-5.54647	1.32174	-4.19635	2.71256e-05	0.000389166	transcribed_processed_pseudogene	ENSG00000248426
ENSG00000291198	8.30305	-5.57849	1.31581	-4.23958	2.23941e-05	0.000330682	lncRNA	ENSG00000291198
ENSG00000235665	62.0502	-5.58405	0.552403	-10.1087	5.05727e-24	8.46212e-22
ENSG00000242641	15.8473	-5.61429	1.11643	-5.0288	4.9356e-07	1.11959e-05	lncRNA	LINC00971
ENSG00000290000	16.9153	-5.72089	1.10455	-5.17939	2.22614e-07	5.57641e-06	lncRNA	ENSG00000290000
ENSG00000235139	9.74663	-5.81098	1.29465	-4.48844	7.17468e-06	0.000121346	lncRNA	LINC03017
ENSG00000263477	27.7179	-5.84566	0.890809	-6.56219	5.30241e-11	2.64978e-09	lncRNA	ENSG00000263477
ENSG00000285768	18.7285	-5.85949	1.0893	-5.37911	7.48535e-08	2.10921e-06	lncRNA	LINC02849
ENSG00000211897	132.333	-5.87675	0.413115	-14.2255	6.36884e-46	3.21508e-43	IG_C_gene	IGHG3
ENSG00000205266	13.3551	-6.27346	1.26222	-4.97017	6.68935e-07	1.46713e-05	transcribed_unprocessed_pseudogene	KRT17P5
ENSG00000229807	899.224	-6.28257	0.184856	-33.9863	3.55376e-253	1.76408e-249	lncRNA	XIST
ENSG00000226097	28.3438	-6.46292	1.0828	-5.96873	2.39109e-09	8.90203e-08	lncRNA	ENSG00000226097
ENSG00000224932	45.5736	-6.57151	0.870338	-7.55052	4.33513e-14	3.16464e-12	lncRNA	LINC02262
ENSG00000233120	8.54989	-6.60844	1.32298	-4.99512	5.87978e-07	1.30982e-05	unprocessed_pseudogene	USP9YP15
ENSG00000171360	18.0146	-6.711	1.24191	-5.40378	6.52511e-08	1.87049e-06	protein_coding	KRT38
ENSG00000235521	9.16893	-6.71191	1.31071	-5.12082	3.04207e-07	7.28921e-06	unprocessed_pseudogene	USP9YP27
ENSG00000214628	18.9301	-6.78227	1.23781	-5.47926	4.27113e-08	1.28108e-06	processed_pseudogene	NDUFB5P2
ENSG00000248222	10.7238	-6.93797	1.29018	-5.37754	7.55102e-08	2.1237e-06	lncRNA	SLIT3-AS1
ENSG00000211898	10.8225	-6.94867	1.31906	-5.26791	1.37985e-07	3.6315e-06	IG_C_gene	IGHD
ENSG00000290655	23.967	-7.12487	1.22747	-5.80453	6.45478e-09	2.23806e-07	lncRNA	ENSG00000290655
ENSG00000230571	13.5093	-7.27072	1.26463	-5.74926	8.96329e-09	3.03367e-07	processed_pseudogene	ENSG00000230571
ENSG00000241328	15.9559	-7.51042	1.25148	-6.00125	1.95805e-09	7.44809e-08	lncRNA	LINC02070
ENSG00000258489	17.5276	-7.64575	1.24488	-6.14175	8.16156e-10	3.31629e-08	lncRNA	ENSG00000258489
ENSG00000071203	100.788	-7.71997	0.849723	-9.08528	1.03436e-19	1.24726e-17	protein_coding	MS4A12
ENSG00000200047	23.3565	-8.06083	1.23421	-6.53116	6.52603e-11	3.21275e-09	misc_RNA	RN7SKP115
ENSG00000238998	57.4978	-8.39458	1.20088	-6.99036	2.74176e-12	1.61385e-10	snRNA	RNU7-187P
ENSG00000289355	123.224	-10.4593	1.18804	-8.80386	1.32193e-18	1.49137e-16	lncRNA	ENSG00000289355
