# Supplementary material
Source: Research Square preprint supplement (doi:10.21203/rs.3.rs-9096293/v1)
Supplement: Supplementary file 4 [file 79ab194d340ba53c4e595acf.xlsx]

## Sheet: Table S5
Supplementary Table 5
Gene	Patients	N	2^(−ΔCt) mean	SD	SEM	95% CI		Student’s t-test
						Lower	Upper	BH-adjusted p
DDC	Control	3	0.348	0.035	0.02	0.262	0.434	0.0227
	Ketamine	3	1.115	0.307	0.177	0.353	1.877
SLC6A3	Control	3	1.731	0.29	0.167	1.011	2.451	0.0075
	Ketamine	3	0.193	0.053	0.031	0.062	0.325
GPR183	Control	3	0.663	0.048	0.027	0.545	0.781	0.2965
	Ketamine	3	0.562	0.126	0.073	0.248	0.876
DRD1	Control	3	0.114	0.002	0.001	0.109	0.119	0.0163
	Ketamine	3	0.165	0.017	0.01	0.122	0.208
GRM4	Control	3	0.167	0.016	0.009	0.127	0.207	0.0057
	Ketamine	3	0.07	0.013	0.008	0.037	0.103
IL1RAPL2	Control	3	0.155	0.008	0.005	0.135	0.175	0.4527
	Ketamine	3	0.131	0.048	0.028	0.011	0.252
MAOA	Control	3	0.056	0.006	0.003	0.042	0.071	0.0732
	Ketamine	3	0.08	0.014	0.008	0.045	0.114
SLC6A12	Control	3	0.01	0.001	0.001	0.007	0.014	0.0196
	Ketamine	3	0.004	0.001	0.001	0.001	0.008
SLC6A13	Control	3	0.017	0.007	0.004	0.001	0.033	0.0232
	Ketamine	3	0.002	0.001	0.001	-0.002	0.005
