# Supplementary material
Source: Research Square preprint supplement (doi:10.21203/rs.3.rs-9096293/v1)
Supplement: Supplementary file 5 [file a021a9c169223e47d0a2291a.xlsx]

## Sheet: Table S3
	Supplementary Table 3
Group	Database	ID Database	Description	GeneRatio	BgRatio	pvalue	p.adjust	qvalue	geneID	Count
upregulated	KEGG	hsa05030	Cocaine addiction	3/17	49/8859	0.000102407	0.00614122	0.00495608	MAOA/DDC/DRD1	3
upregulated	KEGG	hsa05031	Amphetamine addiction	3/17	69/8859	0.000284393	0.00614122	0.00495608	MAOA/DDC/DRD1	3
upregulated	KEGG	hsa00982	Drug metabolism - cytochrome P450	3/17	73/8859	0.000335999	0.00614122	0.00495608	FMO1/UGT2B28/MAOA	3
upregulated	KEGG	hsa00360	Phenylalanine metabolism	2/17	16/8859	0.000409415	0.00614122	0.00495608	MAOA/DDC	2
upregulated	KEGG	hsa04726	Serotonergic synapse	3/17	115/8859	0.00126896	0.0152275	0.0122889	HTR1F/MAOA/DDC	3
upregulated	KEGG	hsa04728	Dopaminergic synapse	3/17	132/8859	0.00188706	0.0180126	0.0145365	MAOA/DDC/DRD1	3
upregulated	KEGG	hsa00350	Tyrosine metabolism	2/17	36/8859	0.00210147	0.0180126	0.0145365	MAOA/DDC	2
upregulated	KEGG	hsa00380	Tryptophan metabolism	2/17	42/8859	0.00285265	0.0213949	0.0172661	MAOA/DDC	2
upregulated	KEGG	hsa05034	Alcoholism	3/17	188/8859	0.00513597	0.0342398	0.0276321	MAOA/DDC/DRD1	3
downregulated	Reactome	R-HSA-209822	Glycoprotein hormones	4/94	12/11009	2.34154e-06	0.000845895	0.000777269	LHB/CGB3/CGB8/CGB5	4
downregulated	Reactome	R-HSA-209952	Peptide hormone biosynthesis	4/94	14/11009	4.67346e-06	0.000845895	0.000777269	LHB/CGB3/CGB8/CGB5	4
downregulated	Reactome	R-HSA-2980736	Peptide hormone metabolism	7/94	89/11009	1.02912e-05	0.00124181	0.00114106	CPB2/LHB/ISL1/CGB3/MME/CGB8/CGB5	7
downregulated	Reactome	R-HSA-500792	GPCR ligand binding	14/94	468/11009	3.9776e-05	0.00359973	0.00330769	NPY/AGTR1/WNT9A/GRM4/WNT6/SCT/DHH/LHB/WNT8B/S1PR5/VIPR2/P2RY2/GPR183/SSTR5	14
downregulated	Reactome	R-HSA-373080	Class B/2 (Secretin family receptors)	6/94	95/11009	0.00015567	0.0112705	0.0103561	WNT9A/WNT6/SCT/DHH/WNT8B/VIPR2	6
downregulated	Reactome	R-HSA-8866910	TFAP2 (AP-2) family regulates transcription of growth factors and their receptors	3/94	15/11009	0.000254641	0.0153633	0.0141169	CGB3/CGB8/CGB5	3
downregulated	Reactome	R-HSA-209776	Metabolism of amine-derived hormones	3/94	18/11009	0.00044827	0.0231819	0.0213012	DIO3/TPH2/DBH	3
downregulated	Reactome	R-HSA-442660	Na+/Cl- dependent neurotransmitter transporters	3/94	19/11009	0.000529037	0.0239389	0.0219968	SLC6A12/SLC6A13/SLC6A3	3
